# Supplementary material
Source: ML conference proceedings conference paper supplement (https://openreview.net/forum?id=2Tv54LpM9cK)

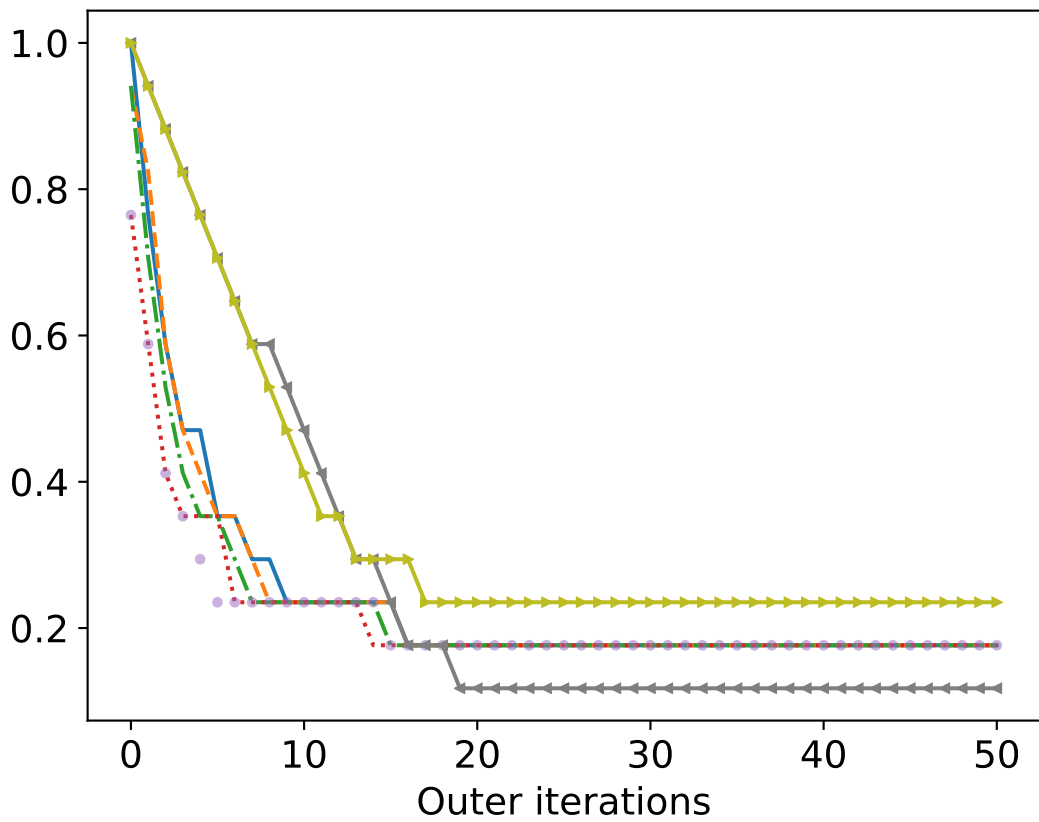

Supplement: supplementary_material [file attachment]

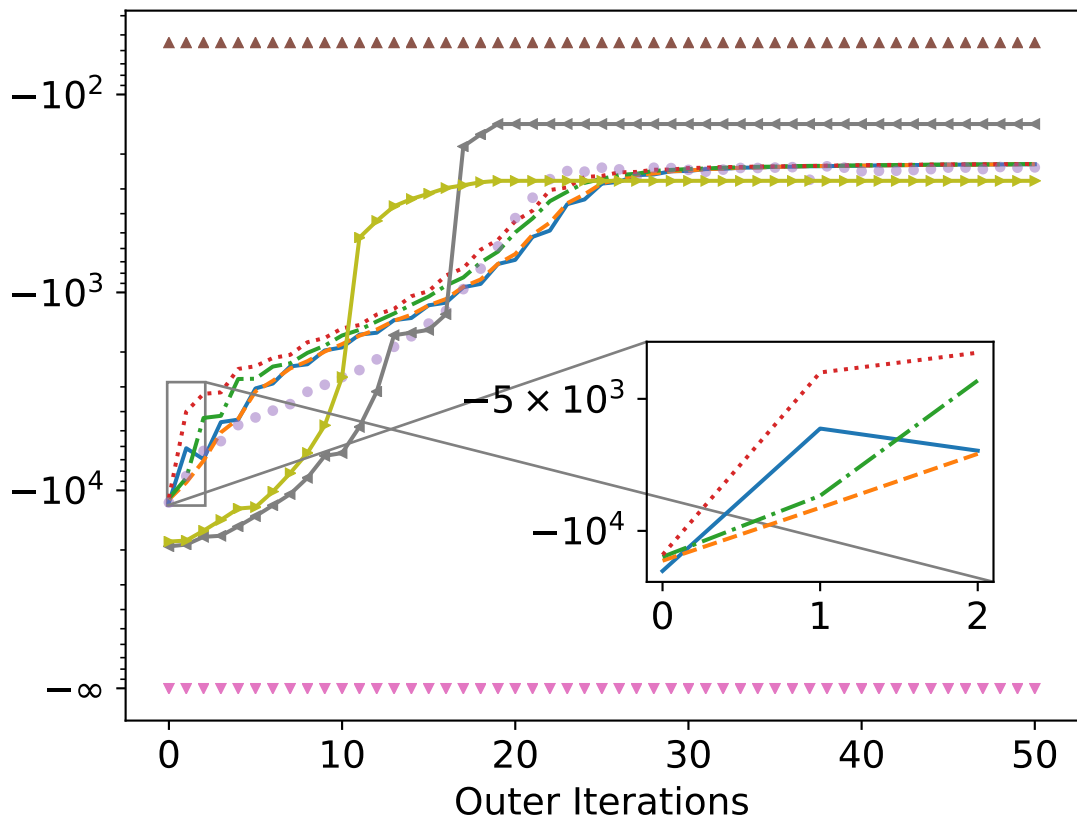

Supplement: supplementary_material [file attachment]

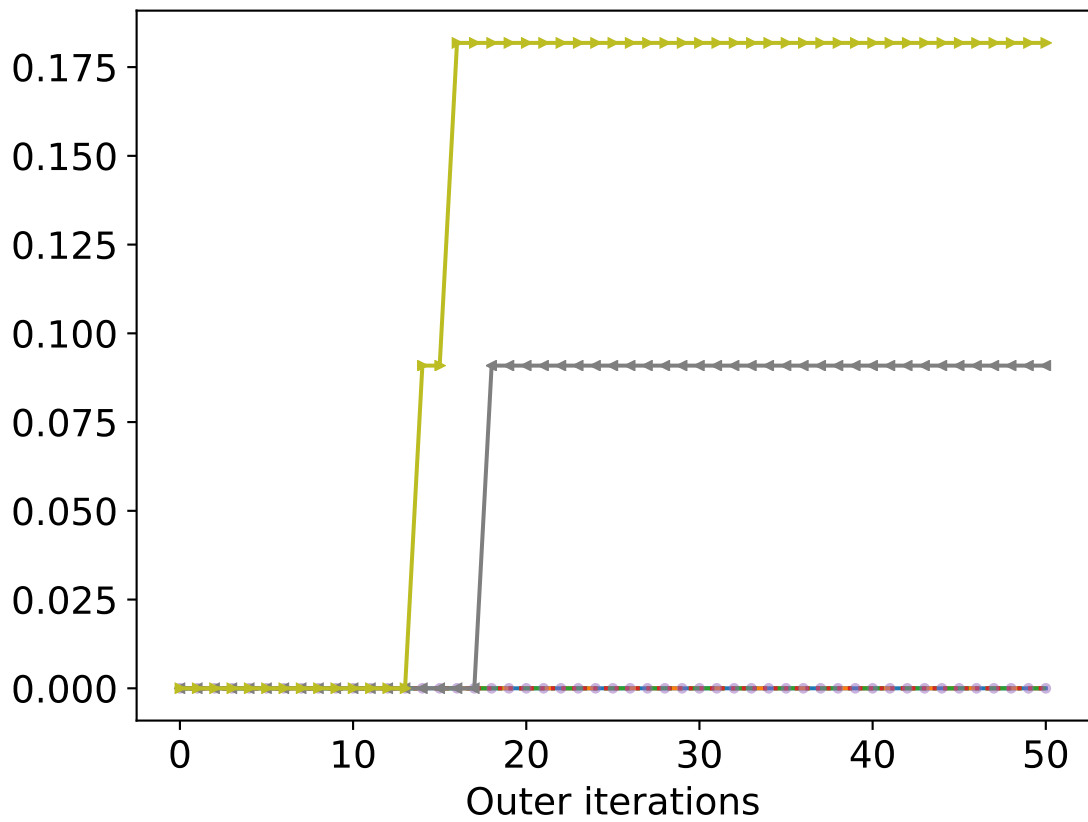

Supplement: supplementary_material [file attachment]

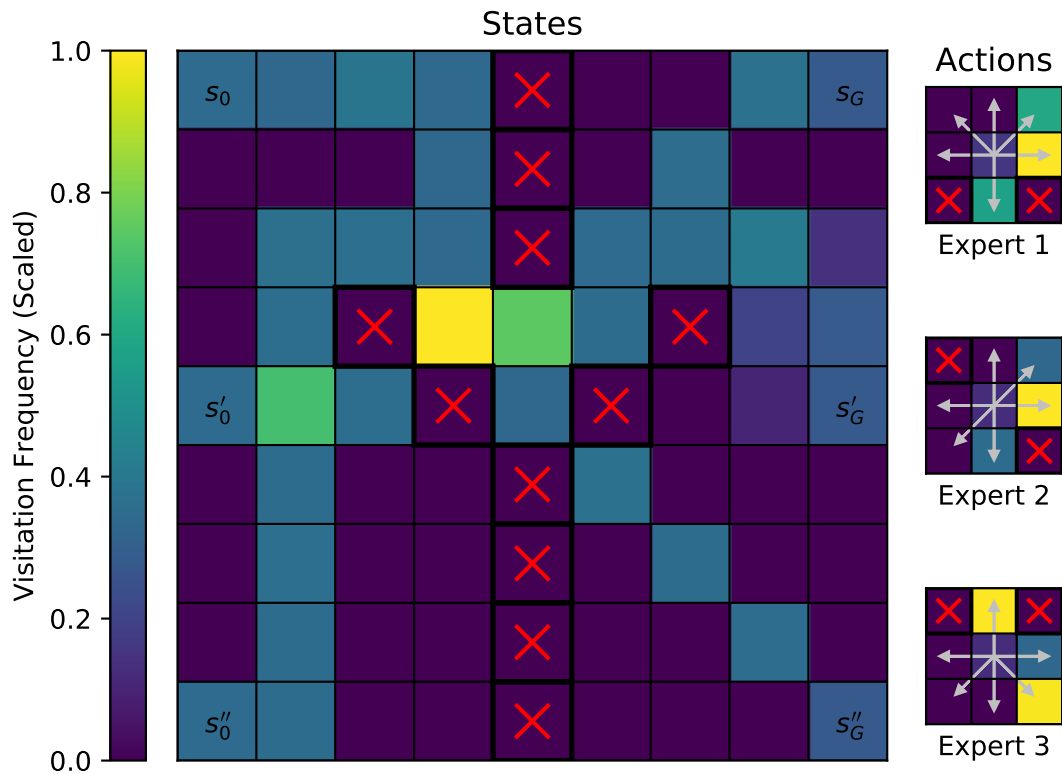

Supplement: supplementary_material [file attachment]

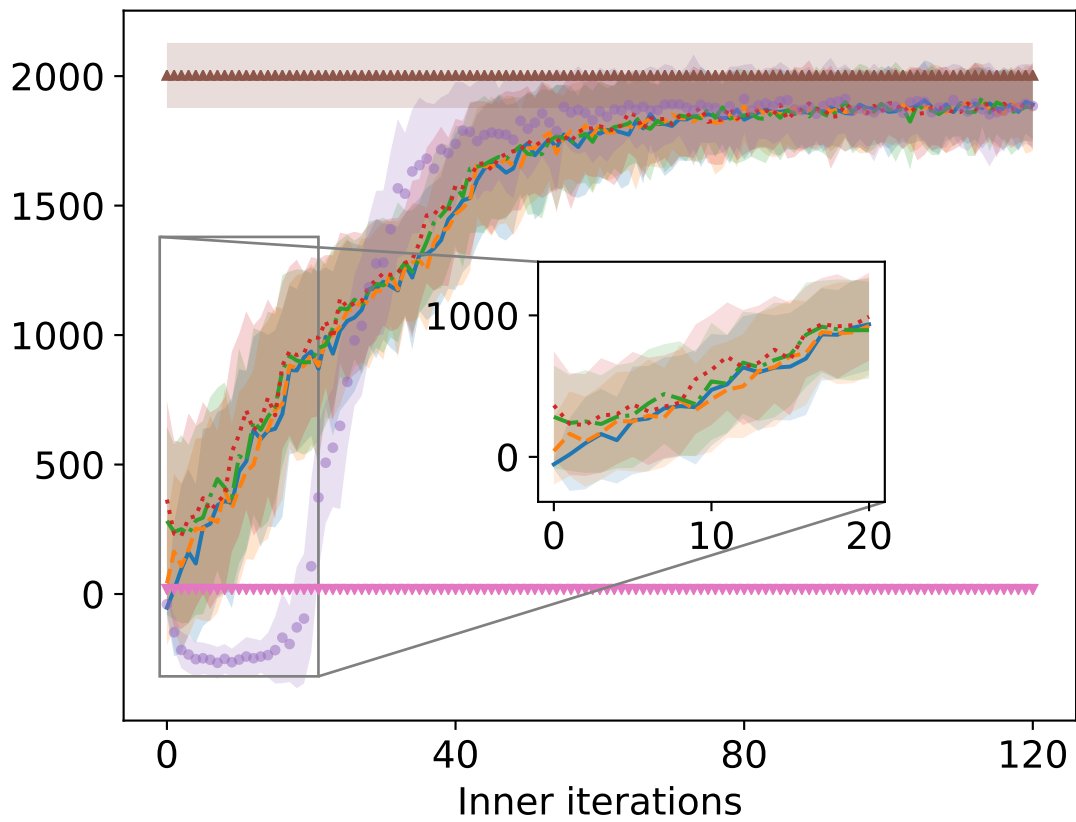

Supplement: supplementary_material [file attachment]

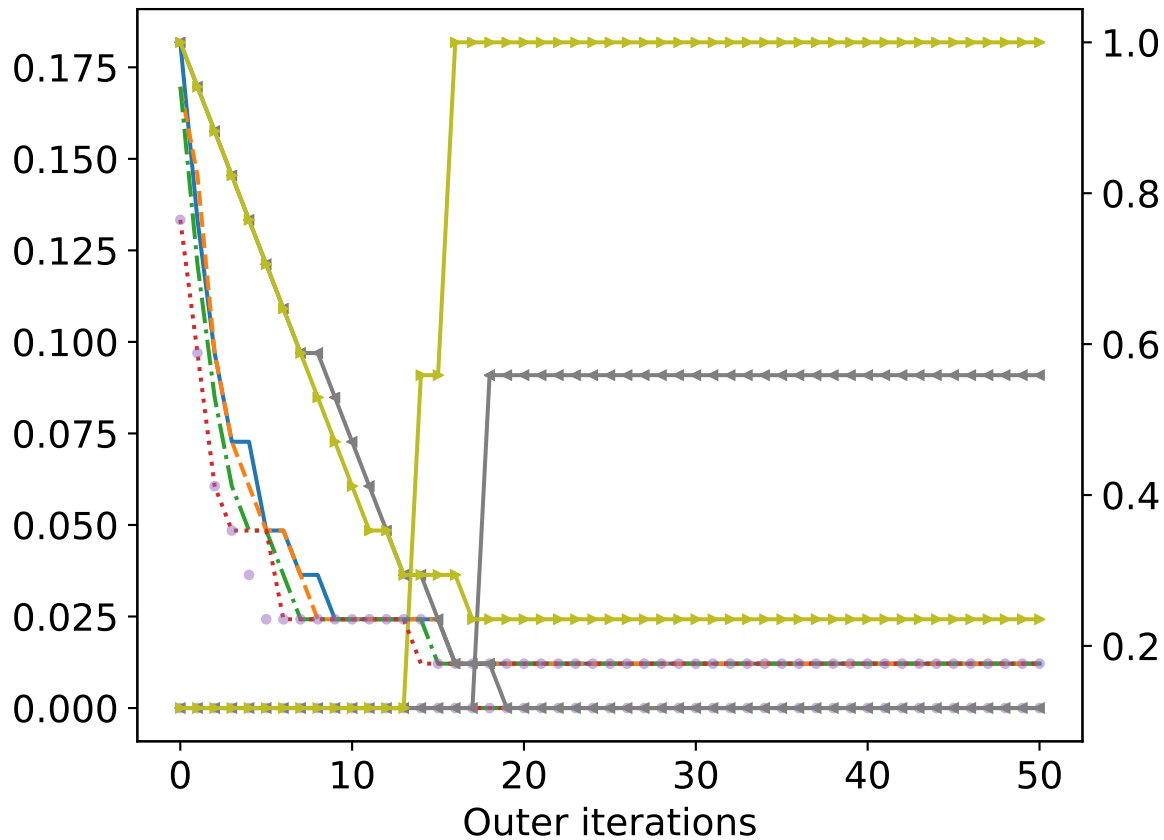

Supplement: supplementary_material [file attachment]

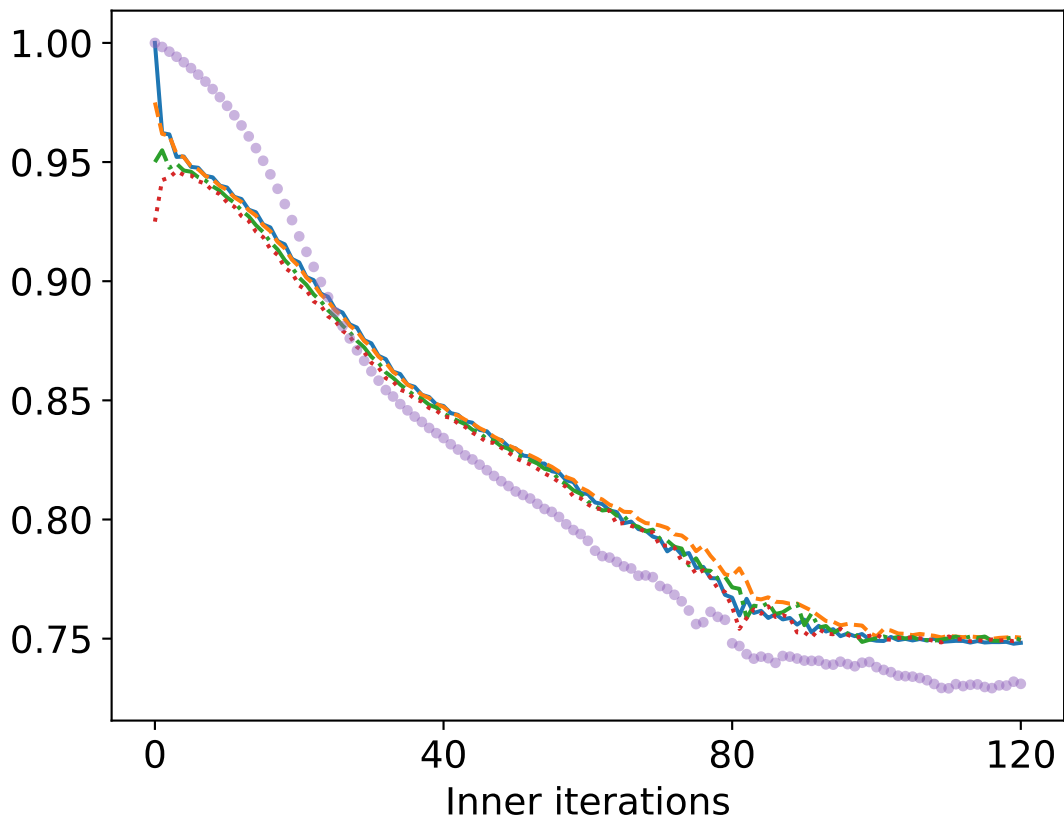

Supplement: supplementary_material [file attachment]

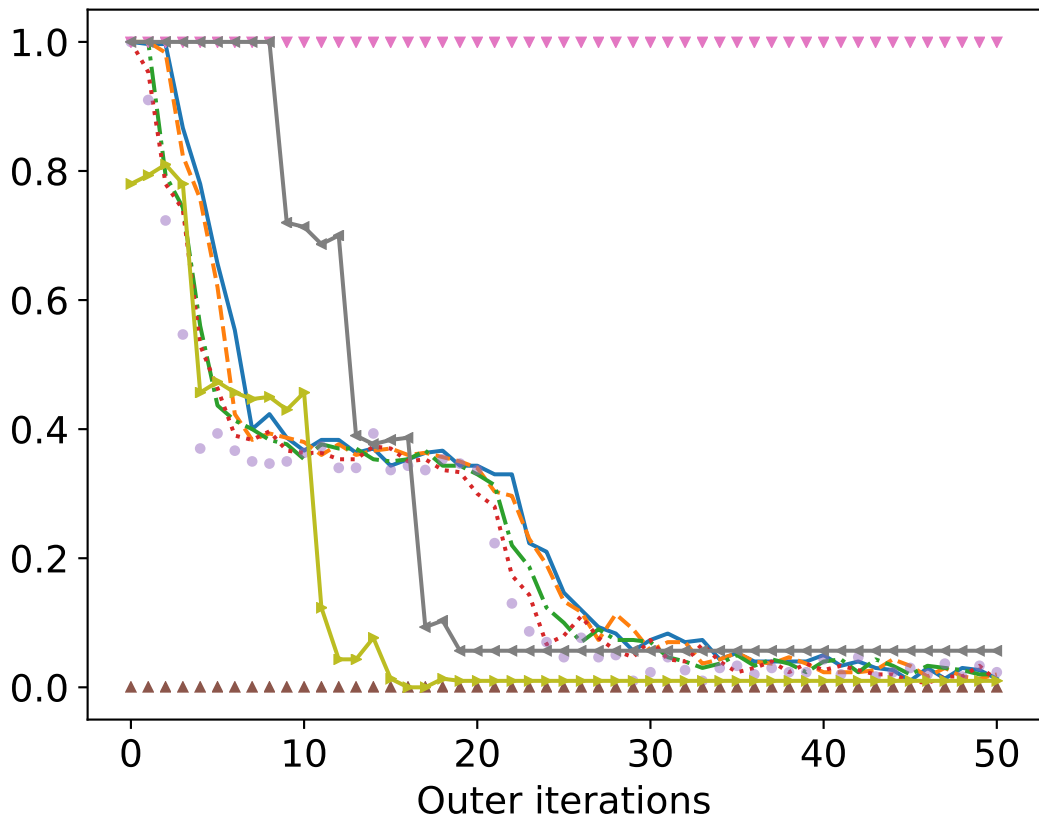

Supplement: supplementary_material [file attachment]

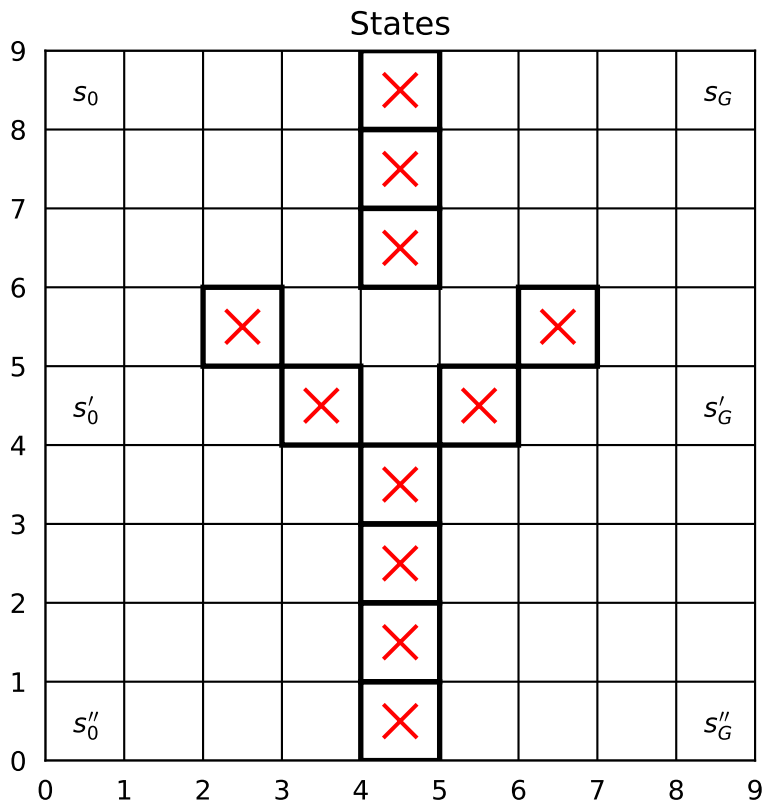

Actions

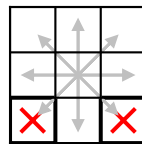

Expert 1

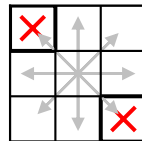

Expert 2

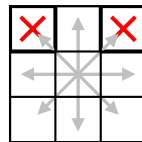

Expert 3

Supplement: supplementary_material [file attachment]

## States

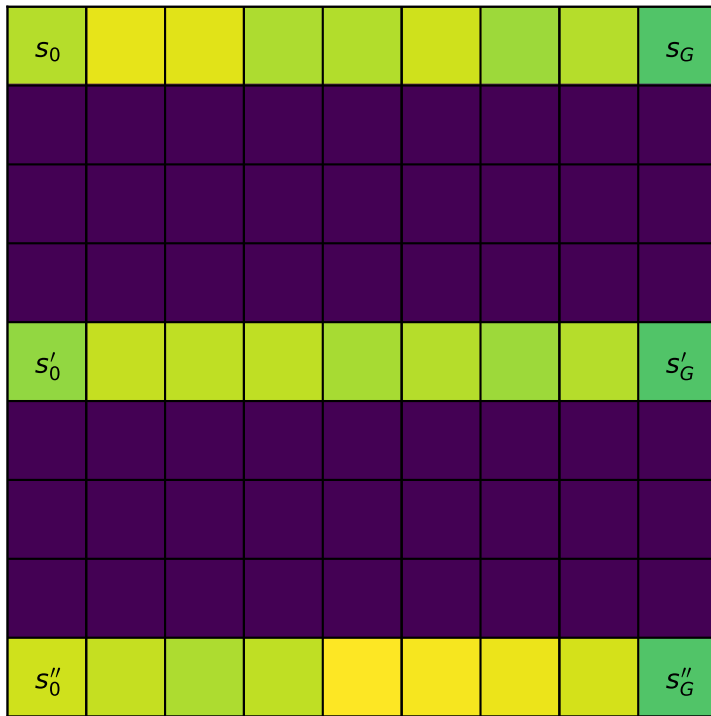

## Actions

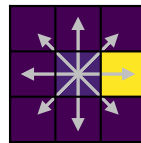

Expert 1

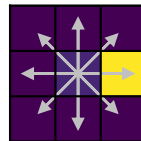

Expert 2

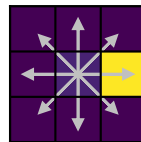

Expert 3

Supplement: supplementary_material [file attachment]

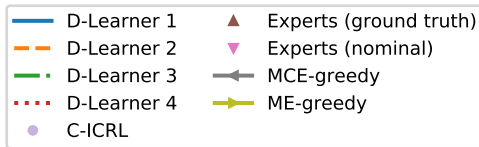

Supplement: supplementary_material [file attachment]

# States

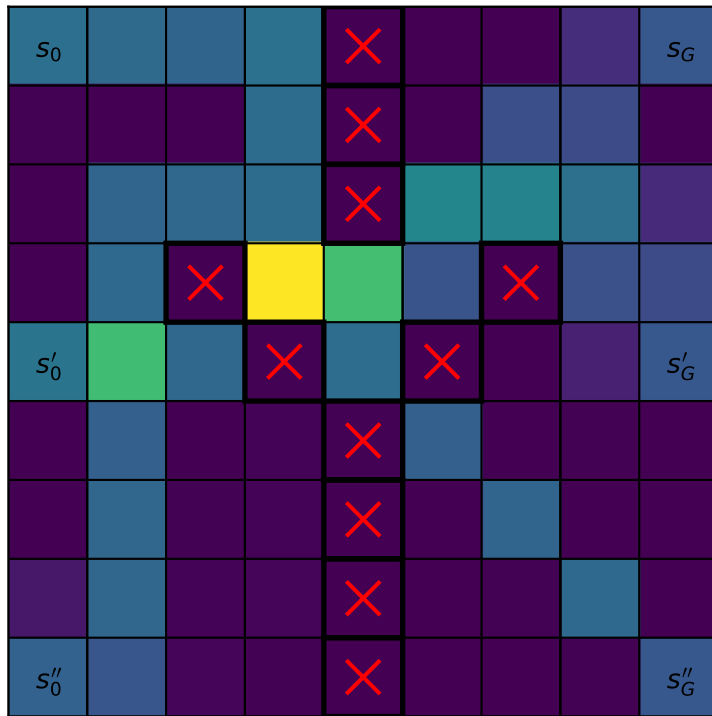

# Actions

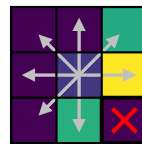

Expert 1

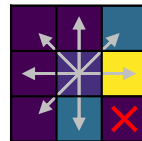

Expert 2

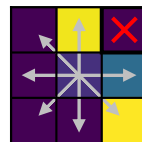

Expert 3

Supplement: supplementary_material [file attachment]

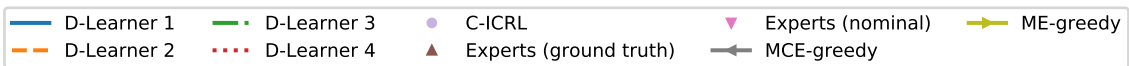

Supplement: supplementary_material [file attachment]
